# Supplementary material for: Effect of Infill Density of the Printed PET-G Structures Containing Iron Oxides on Magnetic Properties
Source: MDPI journal article supplement (doi:10.3390/magnetochemistry9010002), 2022-12-22
Supplement: s1 [file s1]

Article

# Effect of infill density of the printed PET-G structures containing iron oxides on magnetic properties

Lucie Zářbynická<sup>1,2\*</sup>, Martin Marek<sup>1,3</sup>, Radek Ševčík<sup>2,4</sup>, Radek Stolín<sup>5</sup>, Jaroslav Pokorný<sup>4</sup>, Jiří Šál<sup>4</sup>

- <sup>1</sup> College of Polytechnics Jihlava, Department of Technical studies, Tolstého 16, 586 01 Jihlava, Czech Republic<sup>2</sup> Institute of Theoretical and Applied Mechanics of the Czech Academy of Sciences, Centre Telč, Prosecká 809/76, 190 00 Praha 9, Czech Republic  
<sup>3</sup> Technical University of Ostrava, IT4Innovations, Czech Republic, Studentská 6231/1B, 708 00 Ostrava-Poruba, Czech Republic  
<sup>4</sup> Department of Civil Engineering, Faculty of Technology, Institute of Technology and Business, Okružní 517/10, 370 01 České Budějovice, Czech Republic  
<sup>5</sup> College of Polytechnics Jihlava, Department of Mathematics, Tolstého 16, 586 01 Jihlava, Czech Republic  
\* Correspondence: lucie.zarybnicka@vspj.cz

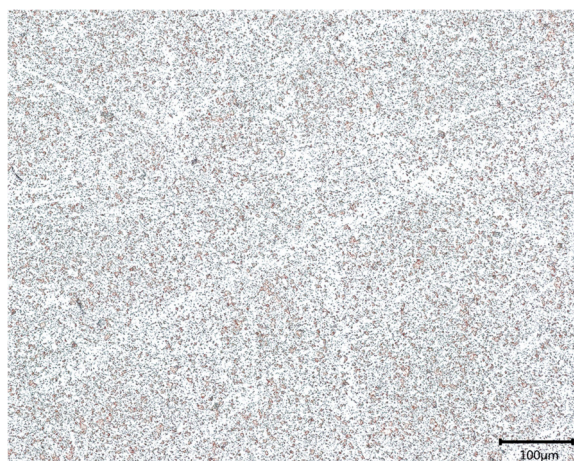

**Figure S1.** Image for analyze of additive particles using SW ImageJ.

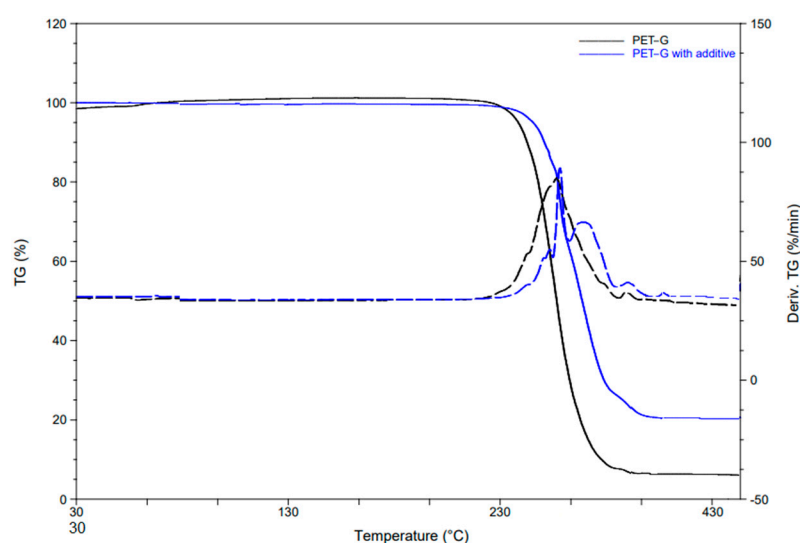

**Figure S2.** TGA graphs for both materials.
