# Supplementary material for: Effect of Infill Density of the Printed PET-G Structures Containing Iron Oxides on Magnetic Properties
Source: MDPI journal article supplement (doi:10.3390/magnetochemistry9010002), 2022-12-22
Supplement: s1 [file s1]

Archive with 1 entries (1 files):
- magnetochemistry-2082881-supplementary.pdf
